# Supplementary material for: Effect of Cardiac Resynchronization on Morbidity and Mortality of Diabetic Patients With Severe Heart Failure
Source: Oxford University Press journal article supplement (doi:10.2337/dc06-2035), 2007-02-27
Supplement: pg722onlineappendixtable.doc [file pg722onlineappendixtable.doc]

Online Table

**Baseline characteristics of the patients**

|  | **Diabetes mellitus (n=207)** | | | **No Diabetes mellitus**  **(n=606)** | **P Value*** |
| --- | --- | --- | --- | --- | --- |
| **on insulin**  **(n=85)** | **on oral hypoglycaemics (n=77)** | **on diet only**  **(n=45)** |
| Age (yr) |  |  |  |  |  |
| Median | 66.2 | 66.4 | 66.5 | 66.5 | 0.75 |
| 25 and 75 percentiles | 61.2, 70.4 | 60.9, 70.2 | 61.4, 70.4 | 58.7, 73.1 |  |
| Male sex (%) | 56 (65.9%) | 53 (68.8) | 33 (73.3%) | 455 (75.1%) | 0.07 |
| Body mass index (kg/m2) |  |  |  |  |  |
| Median | 28.2 | 28.1 | 28.9 | 26.0 | <.0001 |
| 25 and 75 percentiles | 26.0, 31.8 | 24.4, 31.2 | 24.8, 31.8 | 23.2, 29.2 |  |
| NYHA class IV (%) | 8 (9.4%) | 4 (5.2%) | 2 (4.4%) | 36 (5.9%) | 0.74 |
| Ischemic heart disease (%) | 42 (49.4%) | 33 (42.9%) | 19 (42.2%) | 245 (40.5%) | 0.22 |
| Medical history of hypertension (%) | 51 (60.0%) | 41 (53.3%) | 27 (60.0%) | 234 (38.7%) | <.0001 |
| Heart rate (beats/min) |  |  |  |  |  |
| Median | 72 | 72 | 70 | 68 | 0.004 |
| 25 and 75 percentiles | 62, 79 | 66, 81 | 63, 80 | 60, 77 |  |
| Systolic blood pressure (mmHg) |  |  |  |  |  |
| Median | 119 | 120 | 119 | 115 | 0.014 |
| 25 and 75 percentiles | 110, 130 | 110, 140 | 110, 130 | 105, 130 |  |
| Diastolic blood pressure (mmHg) |  |  |  |  |  |
| Median | 70 | 70 | 70 | 70 | 0.64 |
| 25 and 75 percentiles | 60, 80 | 60, 80 | 60, 80 | 60, 80 |  |
| N-terminal pro-brain natriuretic peptide (pg/ml) |  |  |  |  |  |
| Median | 1759 | 1091 | 2064 | 1932 | 0.18 |
| 25 and 75 percentiles | 787, 4499 | 431, 3222 | 592, 6317 | 795, 4186 |  |
| QRS duration (msec) |  |  |  |  |  |
| Median | 160 | 160 | 160 | 160 | 0.0002 |
| 25 and 75 percentiles | 150, 171 | 150, 172 | 152, 172 | 152, 180 |  |
| Interventricular mechanical delay (msec) |  |  |  |  |  |
| Median | 45.0 | 43.3 | 47.8 | 51.0 | 0.005 |
| 25 and 75 percentiles | 28.1, 60.0 | 26.2, 60.7 | 20.5, 70.7 | 33.1, 69.7 |  |
| Left ventricular ejection fraction (%) |  |  |  |  |  |
| Median | 24.4 | 26.4 | 23.4 | 24.7 | 0.19 |
| 25 and 75 percentiles | 22.0, 28.7 | 23.3, 30.4 | 21.5, 29.1 | 21.2, 28.9 |  |
| Left ventricular end-systolic volume index (ml/m2) |  |  |  |  |  |
| Median | 106.1 | 113.2 | 113.7 | 122.5 | 0.0009 |
| 25 and 75 percentiles | 85.7, 130.2 | 86.2, 141.2 | 97.7, 138.2 | 97.2, 153.8 |  |
| Mitral-regurgitation area |  |  |  |  |  |
| Median | 23.2 | 17.2 | 21.8 | 22.0 | 0.62 |
| 25 and 75 percentiles | 13.6, 38.4 | 9.1, 27.0 | 14.9, 27.8 | 10.9, 34.1 |  |
| Glomerular filtration rate (ml/min/1.73 m2) |  |  |  |  |  |
| Median | 58.3 | 64.5 | 59.8 | 60.3 | 0.73 |
| 25 and 75 percentiles | 49.7, 74.3 | 45.5, 75.4 | 45.9, 71.1 | 45.4, 72.7 |  |
| CRP (mg/dl) |  |  |  |  |  |
| Median | 8.0 | 6.0 | 6.7 | 6.0 | 0.46 |
| 25 and 75 percentiles | 1.1, 14.0 | 0.8, 12.0 | 0.7, 24.0 | 1.1, 13.0 |  |
| Use of an ACE inhibitor or AT1 blocker (%) | 80 (94.1%) | 75 (97.4%) | 44 (97.8%) | 571 (94.2%) | 0.37 |
| Use of beta-blocker (%) | 63 (74.1%) | 60 (77.9%) | 32 (71.1%) | 431 (71.1%) | 0.32 |
| Use of statins or fibrates (%) | 51 (60.0%) | 33 (42.9%) | 22 (48.9%) | 226 (37.3%) | 0.0005 |
| Use of aspirin or clopidogrel (%) | 43 (50.6%) | 40 (52.0%) | 23 (51.1%) | 278 (45.9%) | 0.20 |
| Use of warfarin/other coumadin (%) | 27 (31.8%) | 21 (27.3%) | 14 (31.1%) | 215 (35.5%) | 0.15 |

* for comparison between rate in diabetes patients and non diabetes patients
